# Supplementary material
Source: PubMed Central journal article supplement (PMC4603648)

## Supporting Information

# Bioimaging of Hyaluronate - Interferon $\alpha$ Conjugates Using a Non-Interfering Zwitterionic Fluorophore

*Ki Su Kim,<sup>†</sup> Hoon Hyun,<sup>§, ¶</sup> Jeong-A Yang,<sup>‡</sup> Min Young Lee,<sup>‡</sup> Hyemin Kim,<sup>‡</sup>  
Seok-Hyun Yun,<sup>†</sup> Hak Soo Choi,<sup>§,\*</sup> and Sei Kwang Hahn<sup>†,‡,\*</sup>*

<sup>†</sup> Wellman Center for Photomedicine, Massachusetts General Hospital and Harvard Medical School, 65 Landsdowne St. Cambridge, MA 02139, USA.

<sup>‡</sup> Department of Materials Science and Engineering, Pohang University of Science and Technology (POSTECH), San 31, Hyoja-dong, Nam-gu, Pohang, Kyungbuk 790-784, Korea.

<sup>§</sup> Division of Hematology/Oncology, Department of Medicine, Beth Israel Deaconess Medical Center and Harvard Medical School, 330 Brookline Avenue, Boston, MA 02215, USA.

<sup>¶</sup> Department of Biomedical Science, Chonnam National University Medical School, 160 Baekseo-ro, Dong-gu, Gwangju 501-746, Korea

### **\*Corresponding Author**

Tel.: +82 54 279 2159; Fax: +82 54 279 2399; E-mail: skhanb@postech.ac.kr (S.K. Hahn).

Tel.: +1 617 667 6024; Fax: +1 617 667 0214; E-mail: hchoi@bidmc.harvard.edu (H.S. Choi).

**Supplementary Video.** *In situ* real-time biodistribution and clearance of (a) ZW800-1 and (b) HA-IFN $\alpha$ -ZW800-1 conjugate. 50 nmol of ZW800-1 and HA-IFN $\alpha$ -ZW800-1 conjugate were injected intravenously into SD male rats (250 g) and their color-NIR fluorescence images were taken using the FLARE imaging system for 4 h post-injection. Filter sets used were:  $\lambda_{Exc} = 760 \pm 20$  nm and  $\lambda_{Em} = 795$  nm longpass.

(a)

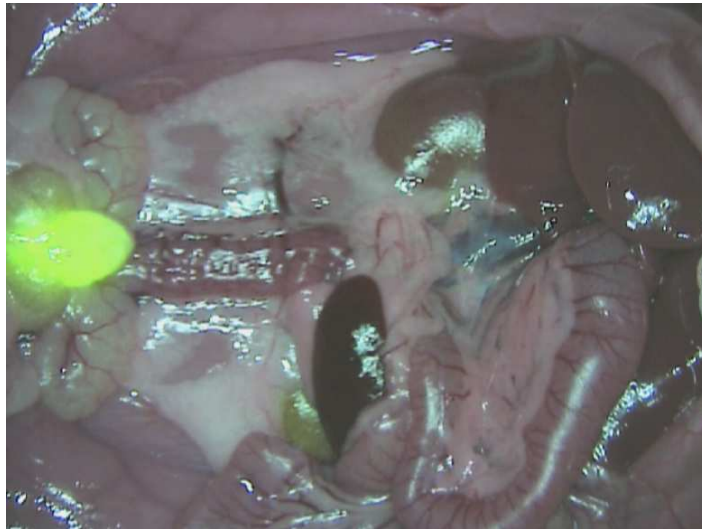

(b)

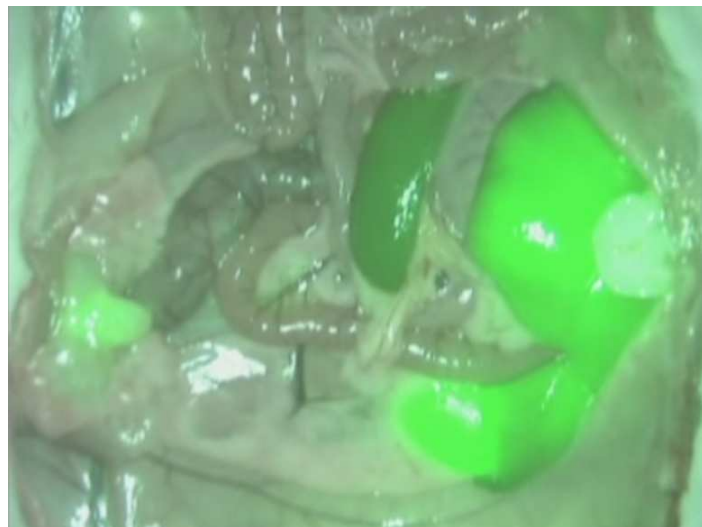

Supplement: NIHMS727353-supplement-method.pdf [file NIHMS727353-supplement-method.pdf]
